# Supplementary material for: Non-invasive cancer detection in canine urine through Caenorhabditis elegans chemotaxis
Source: Front Vet Sci. 2022 Aug 9;9:932474. doi: 10.3389/fvets.2022.932474 (PMC9396970; doi:10.3389/fvets.2022.932474)
Supplement: Supplementary file 4 [file Table_3.XLSX]

## Sheet: Sheet1
Cancer Patients
Patient Code	Name	Breed	Age	Gender	Cancer or not	Average CI	Percent Positive	# Replicates
P01	Rigsby	NA	NA	NA	Lymphoma	0.079	0.8	5
P02	Shiloh	Poodle	10	Male neutered	Oral Melanoma	0.038	0.71	7
P03	Joshua Van Gogh	NA	2	Male neutered	Mast Cell - high grade	0.135	1	7
P04	Dude Hatley	Jack Russell Terrier	7	Male	Mast Cell - low grade	0.161	1	6
P05	Nero Tremont	Retriever	8	Male neutered	Hemangiosarcoma - low grade	0.109	0.67	6
P06	Thumper	Beagle	12	Male	Soft tissue sarcoma - high grade	0.09	0.86	7
P07	Cooper Tuttle	Labrador Retriever	9	Male	Soft tissue sarcoma - low grade	0.04	0.57	7
P08	Jozy	NA	NA	NA	Mast Cell - low grade	0.137	0.86	7
Noncancer Patients
Patient Code	Name	Breed	Age	Gender	Cancer or not	Average CI	Percent Positive	# Replicates
P09	Jasmine	NA	5	NA	Noncancer	-0.035	0.57	7
P10	Luke Shirley	NA	4	NA	Noncancer	-0.057	0.5	6
P11	Moseley	Labrador Retriever	5	Male neutered	Noncancer	0.02	0.5	6
P12	Piper House	Cavalier King Charles	7	Female	Noncancer	0.013	0.6	5
P13	Louis Johnson	Sheepdog Mix	1.3	Male neutered	Noncancer	-0.048	0.29	7
P14	Macy Markham	Bulldog	6.1	Female spayed	Noncancer	0.035	0.57	7
P15	Lucy Richards	NA	6	Female spayed	Noncancer	-0.01	0.4	5
P16	Royal Bankston	Yorkshire Terrier	6.9	Male	Noncancer	-0.147	0	6
P17	Remington Rightmore	Golden Doodle	8.1	Male neutered	Noncancer	0.029	0.57	7
P18	Diamond Harris	Pit Bull	6.3	Unknown	Noncancer	0.036	0.66	7
P19	Daisy Duke Planchard	Bichon	9.8	Female spayed	Noncancer	0.022	0.71	7
P20	Roy	NA	NA	NA	Noncancer	0.002	0.33	6
P21	Common Wollett	Retriever	0.6	Male	Noncancer	0.083	0.83	6
P22	Keela Richardson	Labrador Retriever	9.1	Female spayed	Noncancer	-0.027	0.33	6

## Sheet: Sheet2
	Cancer	Noncancer
	0.079	-0.035
	0.038	-0.057
	0.135	0.02
	0.161	0.013
	0.109	-0.048
	0.09	0.035
	0.04	-0.01
	0.137	-0.147
		0.029
		0.036
		0.022
		0.002
		0.083
		-0.027
Mean	0.098625	-0.006
Std	0.045302	0.0554839
Count	8	14
t_95	2.36	2.16
CI	0.0377993	0.03203
