# Supplementary material for: Non-invasive cancer detection in canine urine through Caenorhabditis elegans chemotaxis
Source: Front Vet Sci. 2022 Aug 9;9:932474. doi: 10.3389/fvets.2022.932474 (PMC9396970; doi:10.3389/fvets.2022.932474)
Supplement: Supplementary file 6 [file Table_5.XLSX]

## Sheet: Sheet1
Patient Code	Name	Breed	Age	Gender	Cancer or not	Tumor Site	Concurrent Diseases	Medications	Average CI	Percent Positive	# Replicates
P23	Penny	German Shorthaired Pointer	10	S	Lymphoma	Lymph Node			0.053	0.67	6
P24	BJ	Mixed Breed	13	C	Lymphoma	Lymph Node			0.057	0.67	6
P25	Tessie	Black and Tan Coon Hound	10	S	Lymphoma	Lymph Node		Clavamox	0.167	0.86	7
P26	Roxie	Labrador Retriever	9	S	Lymphoma	Lymph Node	hip dysplasia	Rimadyl	-0.053	0.33	6
P27	Charcoal	Labrador Retriever	9	S	Lymphoma	Lymph Node		Heartworm prevention	0.069	0.83	6
P28	Lawson	Mixed Breed	11	C	Lymphoma	Lymph Node		Heartgard	0.072	0.6	5
P29	Nessi	Mixed Breed	12	S	Lymphoma	Lymph Node		Glucosamine; Heartworm prevention	0.21	0.83	6
P30	Tilio Bird	Greyhound	9.5	C	Lymphoma	Spleen			0.071	0.71	5
P31	Alize	Mixed Breed	10	S	Lymphoma	Lymph Node	Osteoarthritis, hip dysplasia	Rimadyl or Tramadol	0.054	0.57	7
P32	Teri	Mixed Breed	9	S	Lymphoma	Lymph Node	osteoarthritis		0.089	0.83	6
P33	Hershey	Labrador Retriever	8	C	Mast Cell Tumor	Subcutaneous	CCL tear	Heartworm prevention	0.107	1	5
P34	Wiggles	Boxer	5	C	Mast Cell Tumor	Axilla	heart murmur	Heartworm prevention; Advantix	0.048	0.4	5
P35	Thompson	Red Tick Coon Hound	9	C	Mast Cell Tumor	Skin			-0.119	0.2	5
P36	Terra	Chesapeake Bay Retriever	10	S	Mast Cell Tumor	Subcutaneous			0.133	0.83	6
P37	Shana	Mixed Breed	13	S	Mast Cell Tumor	Subcutaneous			0.072	0.6	5
P38	Coallie	Labrador Retriever	12	S	Mast Cell Tumor	Subcutaneous		Metacam;aspirin	0.118	1	7
P39	Harley	German Shepherd	14	S	Mast Cell Tumor	Skin			0.104	0.8	5
P40	Millie	Beagle	6	S	Mast Cell Tumor	Skin			0.045	0.83	6
P41	Thunder	Labrador Retriever	7	C	Mast Cell Tumor	Subcutaneous			0.191	0.71	7
P42	Boots	Mixed Breed	4	S	Mast Cell Tumor	Skin			0.109	0.8	5
P43	Anna	Mixed Breed	11	S	Melanoma	Skin			0.088	0.83	6
P44	Bear	Mixed Breed	8	M	Melanoma	Tongue	hip dysplasia	Medicam	0.109	0.83	6
P45	Pepper	Miniature Schnauzer	10	S	Melanoma	Mandible			-0.026	0.4	5
P46	Shiloh	Basset Hound	11	S	Melanoma	Maxilla			0.084	0.83	6
P47	Colby	Mixed Breed	13	C	Melanoma	Tongue		cephalexin	0.074	1	4
P48	Kio	Mixed Breed	5	S	Melanoma	Tongue			0.096	0.86	7
P49	Zack	German Shepherd	11	C	Melanoma	Metastasis		Rimadyl;glucosamine	0.16	0.8	5
P50	Charlie	Mixed Breed	12	C	Melanoma	Gingiva	Ventral spondylosis deformans; T3-L3 myelopathy		0.044	0.67	6
P51	Shadow	Labrador Retriever	6	S	Melanoma	Oral Mucosa		Heartworm prevention	-0.018	0.33	6
P52	Lucky	Cocker Spaniel	13	C	Melanoma	Lip			0.204	1	6
P53	Luke	Mixed Breed	13	C	Hemangiosarcoma	Spleen			0.064	0.8	5
P54	Zephyr	Bull Mastiff	10	C	Hemangiosarcoma	Spleen			0.104	0.83	6
P55	Zaney	Mixed Breed	11	S	Hemangiosarcoma	Spleen		Heartworm and flea prevention	-0.015	0.5	6
P56	Callie	Mixed Breed	10	S	Hemangiosarcoma	Spleen			0.085	0.67	6
P57	Traveller	Mixed Breed	14	C	Hemangiosarcoma	Spleen			0.055	0.86	7
P58	Pepper	Mixed Breed	6	S	Hemangiosarcoma	Spleen			0.012	0.4	5
P59	Jackson	Labrador Retriever	11	C	Hemangiosarcoma	Spleen	CCL disease	L carnitine	0.084	0.8	5
P60	Jake	Labrador Retriever	9	C	Hemangiosarcoma	Ribs			0.092	0.83	6
P61	Bosley	Mixed Breed	7	C	Hemangiosarcoma	Spleen			0.139	0.86	7
P62	Kiko	Golden Retriever	14	S	Hemangiosarcoma	Spleen	hypertension; osteoarthritis	Rimadyl;enalapril;tramadol;famotidine	0.088	1	4
