# Supplementary material for: Non-invasive cancer detection in canine urine through Caenorhabditis elegans chemotaxis
Source: Front Vet Sci. 2022 Aug 9;9:932474. doi: 10.3389/fvets.2022.932474 (PMC9396970; doi:10.3389/fvets.2022.932474)
Supplement: Supplementary file 7 [file Table_6.XLSX]

## Sheet: Sheet1
	Noncancer Samples
	P63	P64	P65	P66	P67	P68	P69	P70	P71	P72	P73	P74	P75	P76	P77	P78
Replicate 1	0.111	-0.039	-0.106	-0.04	0.044	0.065	0.011	0	0.02	0.056	-0.047	-0.037	-0.167	-0.1	-0.145	-0.126
Replicate 2	0.129	-0.126	0.085	0.103	-0.176	0.029	0.028	-0.04	-0.034	0.099	0.01	0.048	0.027	-0.182	0.074	-0.172
Replicate 3	-0.055	-0.065	0.033	0.021	0	-0.064	-0.012	-0.129	0.018	0.178	-0.081	0.009	0	0.029	0.045	0.28
Replicate 4	0.101	0.207	0.013	-0.109	0.074	-0.022	0.011	0.056	-0.107	0.009	-0.175	-0.116	0.036	0.276	0.096	0.229
Replicate 5	0.087	0.075	0.218	-0.021	0.01	-0.132	-0.149	-0.098	0	-0.053	-0.014	0.122	-0.009	0.077	-0.156	-0.053
Replicate 6	-0.067	-0.06		0.038	-0.109	0	-0.079	0.038	-0.048	-0.084	0.024	0.152	-0.016	0.009	-0.182	-0.097
Replicate 7				0.26		0		-0.209		0	-0.127	-0.117		0.119	0.059
Mean CI	0.051	-0.001	0.049	0.036	-0.026	-0.018	-0.032	-0.055	-0.025	0.029	-0.059	0.009	-0.021	0.032	-0.03	0.01
