# Supplementary material for: Non-invasive cancer detection in canine urine through Caenorhabditis elegans chemotaxis
Source: Front Vet Sci. 2022 Aug 9;9:932474. doi: 10.3389/fvets.2022.932474 (PMC9396970; doi:10.3389/fvets.2022.932474)
Supplement: Supplementary file 8 [file Table_7.XLSX]

## Sheet: Sheet1
Noncancer Patients
Patient Code	Name	Breed	Age	Gender	Cancer or not	Tumor Site	Concurrent Diseases	Medications	Average CI	Percent Positive	# Replicates
P63	Roxy Moritz	German Shepherd	5	SF	Noncancer	N/A			0.051	0.66	6
P64	Piper Stone		8	SF	Noncancer	N/A		Thyradine, sileo, trazodone	-0.001	0.33	6
P65	Blue Griffin	Mixed	9	SF	Noncancer	N/A		Gabapentin	0.049	0.8	5
P66	Snowball	Bull Dog Mix	8	SF	Noncancer	N/A	Leukopenia, kidney failure	Omeprazole, famotidine	0.036	0.57	7
P67	Bear Pawfect	Great Pyranese	1.6	CM	Noncancer	N/A		Visbiome Probiotic	-0.026	0.5	6
P68	Ant Man Horvath	Hound Mix	9	CM	Noncancer	N/A			-0.018	0.29	7
P69	Jaden Odom	Golden Retriever	10	SF	Noncancer	N/A		Lokivetmab	-0.032	0.5	6
P70	Oliver Duke	Golden Retriever	10	M	Noncancer	N/A			-0.055	0.29	7
P71	Chloe Grosslight	Cavapoo	9	SF	Noncancer	N/A			-0.025	0.33	6
P72	Bailey Geis	Labrador Golden Mix	13	SF	Noncancer	N/A		Prednisone, amlodipine besylate, enalapril maleate	0.029	0.57	7
P73	Lola McCormick	Irish Setter	9	SF	Noncancer	N/A			-0.059	0.29	7
P74	Lucy McCormick	Irish Setter	9	SF	Noncancer	N/A			0.009	0.57	7
P75	Lizzie Poole	Old English	3	SF	Noncancer	N/A			-0.021	0.33	6
P76	Ginger Baker	St. Bernard	10	SF	Noncancer	N/A			0.032	0.71	7
P77	Ian Hutchinson	Terrier Mix	15	CM	Noncancer	N/A		Maropitant citrate, enalapril	-0.03	0.57	7
P78	Louie Cantwell	Weimarener	12	SF	Noncancer	N/A			0.01	0.33	6
